# Supplementary material for: Identifying dementia outcomes in UK Biobank: a validation study of primary care, hospital admissions and mortality data
Source: PubMed Central journal article supplement (PMC6497624; doi:10.1007/s10654-019-00499-1), 2019-02-26
Supplement: 10654_2019_499_MOESM1_ESM.pdf [file 10654_2019_499_MOESM1_ESM.pdf]

## **Electronic supplementary material 1 – Codes used to identify dementia cases and code selection process**

Article: Identifying dementia outcomes in UK Biobank: a validation study of primary care, hospital admissions and mortality data

Authors: Tim Wilkinson, Kathryn Bush, Christian Schnier, Kristiina Rannikmäe, David Henshall, Chris Lerpiniere, Tom C Russ, Deborah Bathgate, Suvankar Pal, John T O'Brien, Cathie LM Sudlow on behalf of Dementias Platform UK

**Corresponding author:** Tim Wilkinson

Affiliations:

1. Centre for Medical Informatics, Usher Institute of Population Health Sciences and Informatics, University of Edinburgh , Edinburgh, UK
2. Centre for Clinical Brain Sciences, University of Edinburgh, Edinburgh, UK
3. Anne Rowling Regenerative Neurology Clinic, University of Edinburgh, Edinburgh, UK

Email: [tim.wilkinson@ed.ac.uk](mailto:tim.wilkinson@ed.ac.uk)

## ICD-10

| Description                                                               | Code  | Subtype |
|---------------------------------------------------------------------------|-------|---------|
| Dementia in Alzheimer's disease                                           | F00   | AD      |
| Dementia in Alzheimer's disease with early onset                          | F00.0 | AD      |
| Dementia in Alzheimer's disease with late onset                           | F00.1 | AD      |
| Dementia in Alzheimer's disease, atypical or mixed type                   | F00.2 | AD      |
| Dementia in Alzheimer's disease, unspecified                              | F00.9 | AD      |
| Alzheimer's disease                                                       | G30   | AD      |
| Alzheimer's disease with early onset                                      | G30.0 | AD      |
| Alzheimer's disease with late onset                                       | G30.1 | AD      |
| Other Alzheimer's disease                                                 | G30.8 | AD      |
| Alzheimer's disease unspecified                                           | G30.9 | AD      |
| Vascular dementia                                                         | F01   | VD      |
| Vascular dementia of acute onset                                          | F01.0 | VD      |
| Multi-infarct dementia                                                    | F01.1 | VD      |
| Subcortical vascular dementia                                             | F01.2 | VD      |
| Mixed cortical and sub-cortical vascular dementia                         | F01.3 | VD      |
| Other vascular dementia                                                   | F01.8 | VD      |
| Vascular dementia, unspecified                                            | F01.9 | VD      |
| Binswanger's disease                                                      | I67.3 | VD      |
| Dementia in Picks disease                                                 | F02.0 | FTD     |
| Circumscribed brain atrophy                                               | G31.0 | FTD     |
| Sporadic Creutzfeldt-Jakob disease                                        | A81.0 | O       |
| Dementia in Creutzfeldt-Jacob disease                                     | F02.1 | O       |
| Dementia in Huntington's disease                                          | F02.2 | O       |
| Dementia in Parkinson's disease                                           | F02.3 | O       |
| Dementia in HIV disease                                                   | F02.4 | O       |
| Mental and behavioural disorders due to use of alcohol - amnesic syndrome | F10.6 | O       |
| Dementia in other diseases classified elsewhere                           | F02   | N       |
| Dementia in other specified diseases classified elsewhere                 | F02.8 | N       |
| Unspecified dementia                                                      | F03   | N       |
| Delirium superimposed on dementia                                         | F05.1 | N       |
| Senile degeneration of brain                                              | G31.1 | N       |
| Other specified degenerative diseases of nervous system                   | G31.8 | N       |

## Read version 2

| Description                                                                 | Code  | Subtype | Administrative or diagnostic code |
|-----------------------------------------------------------------------------|-------|---------|-----------------------------------|
| [X] Dementia in Alzheimer's disease                                         | Eu00. | AD      | D                                 |
| [X]Dementia in Alzheimer's disease with early onset                         | Eu000 | AD      | D                                 |
| [X]Dementia in Alzheimer's disease with late onset                          | Eu001 | AD      | D                                 |
| [X]Dementia in Alzheimer's disease, atypical or mixed type                  | Eu002 | AD      | D                                 |
| [X]Dementia in Alzheimer's disease, unspecified                             | Eu00z | AD      | D                                 |
| Alzheimer's disease                                                         | F110. | AD      | D                                 |
| Alzheimer's disease with early onset                                        | F1100 | AD      | D                                 |
| Alzheimer's disease with late onset                                         | F1101 | AD      | D                                 |
| Senile degeneration of brain                                                | F112. | AD      | D                                 |
| [X] Other Alzheimer's disease                                               | Fyu30 | AD      | D                                 |
| Multi-infarct dementia                                                      | E004. | VD      | D                                 |
| Uncomplicated arteriosclerotic dementia                                     | E0040 | VD      | D                                 |
| Arteriosclerotic dementia with delirium                                     | E0041 | VD      | D                                 |
| Arteriosclerotic dementia with paranoia                                     | E0042 | VD      | D                                 |
| Arteriosclerotic dementia with depression                                   | E0043 | VD      | D                                 |
| Arteriosclerotic dementia NOS                                               | E004z | VD      | D                                 |
| [X]Vascular dementia                                                        | Eu01. | VD      | D                                 |
| [X]Vascular dementia of acute onset                                         | Eu010 | VD      | D                                 |
| [X]Multi-infarct dementia                                                   | Eu011 | VD      | D                                 |
| [X]Other vascular dementia                                                  | Eu01y | VD      | D                                 |
| [X]Vascular dementia, unspecified                                           | Eu01z | VD      | D                                 |
| Cerebral degeneration due to cerebrovascular disease                        | F11x2 | VD      | D                                 |
| Binswanger's disease                                                        | F21y2 | VD      | D                                 |
| [X] Lewy body dementia                                                      | Eu025 | DLB     | D                                 |
| Lewy body disease                                                           | F116. | DLB     | D                                 |
| [X] Dementia in Picks disease                                               | Eu020 | FTD     | D                                 |
| Pick's disease                                                              | F111. | FTD     | D                                 |
| Frontotemporal degeneration                                                 | F118. | FTD     | D                                 |
| Jakob-Creutzfeldt disease                                                   | A411. | O       | D                                 |
| Sporadic Creutzfeldt-Jakob disease                                          | A4110 | O       | D                                 |
| Alcoholic dementia, NOS                                                     | E012. | O       | D                                 |
| Dementia in conditions EC                                                   | E041. | O       | D                                 |
| [X] Dementia in other diseases classified elsewhere                         | Eu02. | O       | D                                 |
| [X] Dementia in Creutzfeldt-Jacob disease                                   | Eu021 | O       | D                                 |
| [X] Dementia in Huntington's disease                                        | Eu022 | O       | D                                 |
| [X] Dementia in Parkinson's disease                                         | Eu023 | O       | D                                 |
| [X] Dementia in HIV disease                                                 | Eu024 | O       | D                                 |
| [X]Dementia in other specified diseases classified elsewhere                | Eu02y | O       | D                                 |
| [X]Mental and behavioural disorders due to use of alcohol: amnesic syndrome | Eu106 | O       | D                                 |

|                                                                                                       |       |   |   |
|-------------------------------------------------------------------------------------------------------|-------|---|---|
| [X]Mental and behavioural disorders due to use of alcohol: residual and late-onset psychotic disorder | Eu107 | O | D |
| Cerebral degeneration due to Jacob-Creutzfeldt disease                                                | F11x7 | O | D |
| Cerebral degeneration due to Parkinson's disease                                                      | F11x9 | O | D |
| Corticobasal degeneration                                                                             | F11y2 | O | D |
| H/O: dementia                                                                                         | 1461. | N | A |
| Assessment of psychotic and behavioural symptoms of dementia                                          | 38C13 | N | A |
| GDS level 4 - moderate cognitive decline                                                              | 3AE3. | N | A |
| GDS level 5 - moderately severe cognitive decline                                                     | 3AE4. | N | A |
| GDS level 6 - severe cognitive decline                                                                | 3AE5. | N | A |
| GDS level 7 - very severe cognitive decline                                                           | 3AE6. | N | A |
| Dementia monitoring                                                                                   | 66h.. | N | A |
| Dementia annual review                                                                                | 6AB.. | N | A |
| Dementia medication review                                                                            | 8BM02 | N | A |
| Shared care – prescribing drug for dementia                                                           | 8BM50 | N | A |
| Shared care – prescribing drug for dementia declined                                                  | 8BM60 | N | A |
| Antipsyc drug therapy dementia                                                                        | 8BPa. | N | A |
| Dementia advance care plan                                                                            | 8CMe0 | N | A |
| Review of dementia advance care plan                                                                  | 8CMG2 | N | A |
| Dementia care plan                                                                                    | 8CMZ. | N | A |
| Dementia care plan agreed                                                                             | 8CMZ0 | N | A |
| Dementia care plan reviewed                                                                           | 8CMZ1 | N | A |
| Dementia care plan declined                                                                           | 8CMZ2 | N | A |
| Dementia care plan review declined                                                                    | 8CMZ3 | N | A |
| Dementia advance care plan agreed                                                                     | 8CSA. | N | A |
| Referral to dementia care advisor                                                                     | 8Hla. | N | A |
| Dementia adv care plan declnd                                                                         | 8IAe0 | N | A |
| Dementia advance care plan review declined                                                            | 8IAe2 | N | A |
| Exception reporting: dementia quality indicators                                                      | 9hD.. | N | A |
| Excepted from dementia quality indicators: patient unsuitable                                         | 9hD0. | N | A |
| Excepted from dementia quality indicators: informed dissent                                           | 9hD1. | N | A |
| Dementia monitoring administration                                                                    | 9Ou.. | N | A |
| Dementia monitoring first letter                                                                      | 9Ou1. | N | A |
| Dementia monitoring second letter                                                                     | 9Ou2. | N | A |
| Dementia monitoring third letter                                                                      | 9Ou3. | N | A |
| Dementia monitoring verbal invite                                                                     | 9Ou4. | N | A |
| Dementia monitoring telephone invite                                                                  | 9Ou5. | N | A |
| Senile and presenile organic psychotic condition                                                      | E00.. | N | D |
| Uncomplicated senile dementia                                                                         | E000. | N | D |
| Pre-senile dementia                                                                                   | E001. | N | D |
| Uncomplicated pre-senile dementia                                                                     | E0010 | N | D |
| Pre-senile dementia with delirium                                                                     | E0011 | N | D |
| Pre-senile dementia with paranoia                                                                     | E0012 | N | D |

|                                                          |       |   |   |
|----------------------------------------------------------|-------|---|---|
| Pre-senile dementia with depression                      | E0013 | N | D |
| Pre-senile dementia NOS                                  | E001z | N | D |
| Senile dementia with depressive or paranoid features     | E002. | N | D |
| Senile dementia with paranoia                            | E0020 | N | D |
| Senile dementia with depression                          | E0021 | N | D |
| Senile dementia with depressive or paranoid features NOS | E002z | N | D |
| Senile dementia with delirium                            | E003. | N | D |
| Drug induced dementia                                    | E02y1 | N | D |
| [X]Sub-cortical vascular dementia                        | Eu012 | N | D |
| [X]Mixed cortical and sub-cortical vascular dementia     | Eu013 | N | D |
| [X] Unspecified dementia                                 | Eu02z | N | D |
| [X] Delirium superimposed on dementia                    | Eu041 | N | D |

AD – Alzheimer’s disease, VD – vascular dementia, FTD – frontotemporal dementia, DLB – Dementia with Lewy Bodies, O – other dementia subtype, N – no subtype specified.

D – diagnostic code, A – administrative code

**Note:**

In Scotland, hospital admissions data is available from two datasets depending on the type of hospital – admissions data from medical hospitals (SMR01) and psychiatric hospitals (SMR04). We combined SMR01 and SMR04 datasets as this is the format in which the data are available in England and Wales (Hospital Episode Statistics and Patient Episode Database for Wales respectively).

**Code selection process**

1. We manually searched ICD-10 ([apps.who.int/classifications/icd10/browse/2010/en](http://apps.who.int/classifications/icd10/browse/2010/en)) and Read code browsers ([isd.hscic.gov.uk/trud3/user/guest/group/0/pack/9](http://isd.hscic.gov.uk/trud3/user/guest/group/0/pack/9)) for relevant dementia codes.
2. We then compared our initial list with those used by studies identified in a previous systematic review<sup>1</sup>, adding any additional codes we deemed likely to identify dementia with reasonable accuracy.
3. We scanned additional condition-specific databases for additional codes such as the UK Quality Outcomes Framework guidelines ([content.digital.nhs.uk/qofbrv36](http://content.digital.nhs.uk/qofbrv36)).
4. We conducted a mapping exercise between ICD-10 and Read versions 2 and 3 (using data from [isd.hscic.gov.uk/trud3/user/guest/group/0/home](http://isd.hscic.gov.uk/trud3/user/guest/group/0/home)), adding any missing codes to create the final code list.

## References

1. Wilkinson T, Ly A, Schnier C, et al. Identifying dementia cases with routinely collected health data: A systematic review. *Alzheimers Dement J Alzheimers Assoc.* April 2018. doi:10.1016/j.jalz.2018.02.016
