# Supplementary material for: Identifying dementia outcomes in UK Biobank: a validation study of primary care, hospital admissions and mortality data
Source: Springer Nature journal article supplement (doi:10.1007/s10654-019-00499-1), 2019-02-26
Supplement: MOESM2 [file 16509576]

## Electronic supplementary material 2 – Adjudicator outcome form

Article: Identifying dementia outcomes in UK Biobank: a validation study of primary care, hospital admissions and mortality data

Authors: Tim Wilkinson, Kathryn Bush, Christian Schnier, Kristiina Rannikmäe, David Henshall, Chris Lerpiniere, Tom C Russ, Deborah Bathgate, Suvankar Pal, John T O'Brien, Cathie LM Sudlow on behalf of Dementias Platform UK

**Corresponding author:** Tim Wilkinson

Affiliations:

1. Centre for Medical Informatics, Usher Institute of Population Health Sciences and Informatics, University of Edinburgh, Edinburgh, UK
2. Centre for Clinical Brain Sciences, University of Edinburgh, Edinburgh, UK
3. Anne Rowling Regenerative Neurology Clinic, University of Edinburgh, Edinburgh, UK

Email: [tim.wilkinson@ed.ac.uk](mailto:tim.wilkinson@ed.ac.uk)

## Appendix 2. Adjudicator outcome form

|                        |  |
|------------------------|--|
| Adjudicator            |  |
| Participant identifier |  |

### 1. Sufficient information present to make a diagnosis of dementia (ICD-10 definition)

|                                                                                   |  |
|-----------------------------------------------------------------------------------|--|
| Yes                                                                               |  |
| Dementia likely, but formal definition not met using available information        |  |
| Not dementia                                                                      |  |
| Comments +/- alternative diagnosis (e.g. depression or mild cognitive impairment) |  |

### 2. If dementia present, subtype diagnosis (select one only)

|                                                                                | Meets formal criteria | Formal criteria not met, but subtype likely |
|--------------------------------------------------------------------------------|-----------------------|---------------------------------------------|
| Alzheimer's disease (NIA-AA)                                                   |                       |                                             |
| Vascular dementia (NINDS-AIREN)                                                |                       |                                             |
| Mixed dementia (meets NIA-AA criteria for AD and NINDS-AIREN criteria for VaD) |                       |                                             |
| Dementia with Lewy Bodies (McKeith et al. 2005)                                |                       |                                             |
| Parkinson's disease dementia (Emre et al. 2007)                                |                       |                                             |
| Frontotemporal dementia bvFTD (FTDC) or PPA (Mesulam 2001)                     |                       |                                             |
| Other dementia<br>.....                                                        |                       |                                             |
| No subtype diagnosis possible                                                  |                       |                                             |

### 3. Any other comments .....
